# Supplementary material
Source: PubMed Central journal article supplement (PMC4072030)
Supplement: NIHMS575793-supplement-supplemental_tables.pdf [file NIHMS575793-supplement-supplemental_tables.pdf]

# Age-Related Eye Diseases and Visual Impairment Among U.S. Adults

Chiu-Fang Chou, DrPH, Mary Frances Cotch, PhD, Susan Vitale, PhD, MHS, Xinzhi Zhang, MD, PhD,  
Ronald Klein, MD, MPH, David S. Friedman, MD, PhD, MPH, Barbara E.K. Klein, MD, MPH,  
Jinan B. Saaddine, MD, MPH

## Appendix A

### Age-standardized prevalence of visual impairment among those aged ≥40 years

|                                             | Visual impairment<br>(n=639), % (95% CI) | p-value <sup>a</sup> | p for<br>trend <sup>b</sup> | Visual impairment<br>not due to refractive<br>error (n=185), %<br>(95% CI) | p-value <sup>a</sup> | p for<br>trend <sup>b</sup> |
|---------------------------------------------|------------------------------------------|----------------------|-----------------------------|----------------------------------------------------------------------------|----------------------|-----------------------------|
| <b>Total</b>                                | 7.5 (6.9, 8.1)                           |                      |                             | 2.0 (1.7, 2.3)                                                             |                      |                             |
| <b>Age-related macular<br/>degeneration</b> |                                          | 0.095                |                             |                                                                            | 0.002                |                             |
| No                                          | 5.8 (5.2, 6.4)                           |                      |                             | 0.8 (0.6, 1.1)                                                             |                      |                             |
| Yes                                         | 8.9 (5.9, 13.3)                          |                      |                             | 2.2 (1.5, 3.2)                                                             |                      |                             |
| <b>Glaucoma</b>                             |                                          | 0.056                |                             |                                                                            | 0.112                |                             |
| No                                          | 5.8 (5.2, 6.6)                           |                      |                             | 1.0 (0.7, 1.3)                                                             |                      |                             |
| Yes                                         | 20.2 (9.2, 38.6)                         |                      |                             | 12.4 (3.7, 34.3)                                                           |                      |                             |
| <b>Diabetic retinopathy</b>                 |                                          | 0.001                |                             |                                                                            | 0.045                |                             |
| No                                          | 6.3 (5.6, 7.0)                           |                      |                             | 1.2 (1.03, 1.5)                                                            |                      |                             |
| Yes                                         | 14.5 (10.4, 19.8)                        |                      |                             | 3.5 (1.8, 6.6)                                                             |                      |                             |
| <b>Gender</b>                               |                                          | 0.641                |                             |                                                                            | 0.692                |                             |
| Female                                      | 7.6 (6.6, 8.7)                           |                      |                             | 2.0 (1.6, 2.4)                                                             |                      |                             |
| Male                                        | 7.2 (6.4, 8.2)                           |                      |                             | 1.9 (1.5, 2.4)                                                             |                      |                             |
| <b>Race/ethnicity</b>                       |                                          | 0.001                |                             |                                                                            | 0.237                |                             |
| Non-Hispanic white                          | 6.3 (5.5, 7.2)                           |                      |                             | 1.7 (1.4, 2.0)                                                             |                      |                             |
| Non-Hispanic black                          | 11.3 (9.7, 13.2)                         |                      |                             | 3.1 (2.3, 4.3)                                                             |                      |                             |
| Mexican American                            | 13.2 (10.3, 16.8)                        |                      |                             | 4.0 (2.4, 6.5)                                                             |                      |                             |
| Other                                       | 10.9 (8.1, 14.3)                         |                      |                             | 2.6 (1.5, 4.4)                                                             |                      |                             |
| <b>Education</b>                            |                                          | <0.001               | <0.001                      |                                                                            | <0.001               | <0.001                      |
| > high School                               | 5.9 (5.0, 6.9)                           |                      |                             | 1.3 (0.9, 1.8)                                                             |                      |                             |
| High School                                 | 7.2 (6.0, 8.6)                           |                      |                             | 1.7 (1.3, 2.3)                                                             |                      |                             |
| < high School                               | 11.8 (9.9, 14.1)                         |                      |                             | 3.4 (2.6, 4.3)                                                             |                      |                             |
| <b>Insurance coverage<sup>c</sup></b>       |                                          | 0.001                |                             |                                                                            | 0.013                |                             |
| Uninsured                                   | 17.2 (12.0, 24.0)                        |                      |                             | 9.1 (4.8, 16.3)                                                            |                      |                             |
| Insured                                     | 6.9 (6.3, 7.5)                           |                      |                             | 1.9 (1.6, 2.2)                                                             |                      |                             |
| <b>BMI<sup>d</sup></b>                      |                                          | 0.248                | 0.577                       |                                                                            | 0.991                | 0.048                       |
| Normal                                      | 8.0 (6.5, 9.7)                           |                      |                             | 1.6 (1.2, 2.1)                                                             |                      |                             |
| Overweight                                  | 6.9 (5.8, 8.3)                           |                      |                             | 1.8 (1.4, 2.4)                                                             |                      |                             |

|                                               | Visual impairment<br>(n=639), % (95% CI) | p-value <sup>a</sup> | p for<br>trend <sup>b</sup> | Visual impairment<br>not due to refractive<br>error (n=185), %<br>(95% CI) | p-value <sup>a</sup> | p for<br>trend <sup>b</sup> |
|-----------------------------------------------|------------------------------------------|----------------------|-----------------------------|----------------------------------------------------------------------------|----------------------|-----------------------------|
| Obese                                         | 7.5 (6.6, 8.5)                           |                      |                             | 2.4 (1.8, 3.2)                                                             |                      |                             |
| <b>Smoking status</b>                         |                                          | 0.584                | 0.169                       |                                                                            | 0.33                 | 0.367                       |
| Never smoker                                  | 7.3 (6.5, 8.2)                           |                      |                             | 1.9 (1.5, 2.5)                                                             |                      |                             |
| Past smoker                                   | 7.5 (6.0, 9.3)                           |                      |                             | 1.7 (1.3, 2.3)                                                             |                      |                             |
| Current smoker                                | 9.4 (7.0, 12.5)                          |                      |                             | 2.7 (1.5, 4.9)                                                             |                      |                             |
| <b>Hypertension<sup>c</sup></b>               |                                          | 0.585                |                             |                                                                            | 0.898                |                             |
| No                                            | 7.5 (6.6, 8.5)                           |                      |                             | 1.9 (1.4, 2.5)                                                             |                      |                             |
| Yes                                           | 7.8 (7.0, 8.8)                           |                      |                             | 2.0 (1.6, 2.4)                                                             |                      |                             |
| <b>Cardiovascular<br/>disease<sup>f</sup></b> |                                          | 0.053                |                             |                                                                            | 0.176                |                             |
| No                                            | 6.9 (6.2, 7.7)                           |                      |                             | 1.8 (1.5, 2.1)                                                             |                      |                             |
| Yes                                           | 9.6 (7.2, 12.6)                          |                      |                             | 2.5 (1.7, 3.8)                                                             |                      |                             |

Note: The estimated population of those with visual impairment is 8.9 million. The estimated population of those with visual impairment that is not due to refractive error is 2.2 million. Visual impairment is defined as presenting visual acuity in the better-seeing eye worse than 20/40. Visual impairment not due to refractive error is defined as visual impairment after autorefractive correction. All prevalence estimates are age-standardized to the U.S. 2000 Census population.

<sup>a</sup> Based on chi-square test of within-characteristic categories

<sup>b</sup> Test for trend

<sup>c</sup> Insurance coverage included health insurance obtained through employment or provided through government programs such as Medicare and Medicaid.

<sup>d</sup> BMI was classified as <25.0 for normal, 25.0–29.9 for overweight, or ≥30.0 for obese.

<sup>e</sup> Hypertension was defined as systolic blood pressure ≥140, diastolic blood pressure ≥90, or as being on hypertension medication.

<sup>f</sup> Cardiovascular disease was defined as having self-reported heart attack, heart failure, or stroke.

Data source: National Health and Nutrition and Examination Survey (NHANES), 2005–2008

## Appendix B

**Ocular conditions present in those with visual impairment not due to refractive error among people aged  $\geq 40$  years with visual impairment**

|                           | %    |
|---------------------------|------|
| AMD <sup>a</sup> only     | 31.1 |
| AMD and glaucoma          | 1.9  |
| Glaucoma only             | 2.8  |
| Diabetic retinopathy only | 13.1 |
| Other <sup>b</sup>        | 51.1 |

<sup>a</sup>Age-related macular degeneration (AMD) includes early AMD and late AMD cases.

<sup>b</sup>Other could include eye injury or other diseases such as cataracts.

Data source: National Health and Nutrition and Examination Survey (NHANES)
